# Supplementary material
Source: publisher figshare collection journal article supplement (https://gsapubs.figshare.com/ndownloader/files/38206800)
Supplement: Supplementary file 1 [file 38206800]

## Sheet: 11 sources
DZnmf (11 source factorization)
	empirical source hypotheses	factorized sources	180721FL1	BDJ1ES1	Leadville SG.	SJMT1	Temple Butte SG.	Tonka	Wood River Basin SG.	08BC-1/2	09-CM-699	10DM14	180713SWC3	BCRA-01-10	BDJLS1	CC01	Molas SG.	Surprise Canyon SG.	Tensus-Dimple SG.	06GC147	10DM15	13ROB-1	18BH1	1BDK480	SNFUM1	Cutler_south SG	1MHRCT201	1PL-534	1PS-4	1QZ19	2PCGT180	2QZ-9	2RFMMT3	3FTCT166	4SMST778	5PS-42	5PS-58	5PS-82	Battle	CO-PR2-0.2	CT1	Cutler 1 SG.	Cutler 2 SG.	Cutler 3 SG.	Eagle Valley SG. 1	Eagle Valley SG. 2	Earp-Horquilla SG.	ECS-13-2	Esplanade SG.
	1.70 Ga	WS6	0.0342402	0.453042	0.039789	0.0536077	0.260933	0.00022002	0.00918088	0.259836	0	0.0226057	0.0201669	0.0108645	0	0.311793	0.0152643	0.0583538	0	0.111146	0	0.0331074	0.010353	0.136174	0.596499	0.598576	0.0490693	0.103971	0.0543894	0	0	0.0394884	0.127008	0.394111	0.187652	0.00544601	0.01757	0	0.0022454	0.0171671	0.163244	0.0936996	0.0539969	0.170496	0.176339	0.330446	0.0341103	0	0.0540424
	Triassic Arc	WS9	0	0.000226504	0	0	0	0	0	0.00947469	0	0.00932228	0	0	0.016088	0.0147774	0	0	0	0	0.00117736	0	0.0116219	0	0	0	0.00489523	0	0	0.00198091	0	0	0.0205856	0	0	0	0.00335002	0.00258144	0	0	0	0.0386758	0	0	0.00409647	0	0.00204896	0.0072715	0
	central Appalachian***	WS2	0.344777	0	0.0611741	0.010938	0.0163323	0	0	0.0325524	0.404841	0.0428428	0.347446	0.569233	0	0	0.375168	0.432856	0.390475	0.265989	0.186139	0.196168	0.164019	0.00949454	0	0	0.0774181	0.155387	0.234364	0.122875	0.00361319	0.140785	0	0	0	0.234591	0.177783	0.304646	0.0455011	0.187449	0	0	0	0	0.152889	0.101642	0.177708	0.350551	0.273961
	1.66 Ga	WS1	0.114676	0.524959	0.11622	0.115488	0.0590319	0	0.00154575	0.468623	0.0839024	0.289166	0.103334	0.018794	0.817743	0	0.0916746	0.114592	0.116409	0.187616	0.106288	0.227473	0.280851	0.616616	0.265534	0.290527	0.157088	0.343092	0.286629	0.358392	0.0807064	0.296767	0.059417	0	0.318858	0.244798	0.307457	0.286288	0	0.084157	0.181446	0	0	0	0.23265	0	0.283892	0.262839	0.247101
	1.43 Ga	WS8	0.0391285	0.00947084	0.17398	0.0966335	0.161462	0.00277721	0	0.0838277	0.0700653	0.0550721	0.00420846	0.0386927	0.0128287	0.453115	0.0757317	0.0921232	0.0288873	0.0580966	0.0426293	0	0.0345836	0.126893	0	0	0.0397421	0.0109057	0.00913195	0.0620665	0.878107	0.0529719	0.296573	0.43526	0.317706	0.0612801	0.0537557	0.0368436	0	0.00860336	0.65531	0.692412	0.946003	0.223092	0.191632	0.0477753	0.0280075	0.0264882	0.0488754
	Antler recycled	WS5	0.0404208	0.0123019	0.303151	0.365239	0.116584	0.951361	0.904544	0.0874209	0.0245532	0.172048	0.0670157	0.129126	0	0	0.0226858	0.0742734	0.0575731	0.23356	0.344064	0.0854467	0.193705	0	0.0216586	0	0.0599759	0.0700961	0.120526	0.107665	0	0.038237	0.152229	0	0	0.161313	0.109398	0.12266	0.844584	0.0629004	0	0	0	0.00318938	0.0603527	0.0172201	0.116605	0.0449105	0.172828
	530 Ma	WS10	0.00723626	0	0.00289548	0	0.0256102	0	0.00221157	0.00531677	0.0360143	0.0556154	0.00229469	0.0199995	0.0549963	0.079448	0.0256509	0.00817889	0.0338793	0	0.0279663	0.0356331	0	0.00413233	0	0	0.0812373	0.0210008	0.00373225	0.00375115	0	0.0254035	0	0	0.120215	0	0	0.00386947	0	0.0151946	0	0	0	0.33212	0.00345356	0.0151248	0.0139521	0.00804901	0
	Maya Block, Macal Fm.	WS3	0.26869	0	0	0	0	0	0	0.0251197	0.317947	0.16248	0.34922	0.197971	0.0128559	0.00535154	0.2772	0.128701	0.167774	0.0185203	0.150262	0.0369744	0.0602759	0	0	0	0.20633	0.0858174	0.0506509	0.10777	0.00304487	0.134663	0.00913188	0	0.0555693	0.0572796	0.0710819	0.0490636	0	0.237602	0	0	0	0.0169362	0	0.0141586	0.0950459	0.0883946	0.0545833
	Maya Block, Santa Fe Fm.	WS7	0	0	0	0.000746969	0	0.0127915	0.00352938	0.0278294	0.0243265	0.0488697	0	0	0.0557653	0	0.0536864	0.0283738	0.106777	0.0342566	0	0.307659	0.0581345	0	0.00922133	0.00403027	0.269453	0.0810815	0.0169689	0.0182163	0	0.15243	0	0.00374627	0	0	0.0153417	0.00167519	0.00287574	0.330727	0	0	0	0	0.00803698	0.069918	0.0760284	0	0
	Archean & Proterozoic	WS11	0.0781348	0	0	0.00866611	0.0128144	0.0171096	0.0169686	0	0.00912875	0.077701	0.0668388	0.01532	0.0297227	0	0.0393406	0.0146043	0.0317914	0	0.04278	0.0136722	0	0.10669	0	0	0.00881704	0.0279553	0.0527244	0.0508558	0.0345283	0.0280525	0.00581128	0	0	0.0273789	0.0668225	0.0463951	0.104794	0.0556506	0	0	0	0	0.0125391	0.022566	0.0507073	0.0762005	0.0201495
	1.73 Ga	WS4	0.0726956	0	0.30279	0.34868	0.347233	0.0157406	0.0620203	0	0.0292214	0.0642779	0.0394751	0	0	0.135515	0.0235986	0.0479435	0.0664341	0.090816	0.098694	0.0638659	0.186456	0	0.107087	0.106866	0.0459737	0.100693	0.170883	0.166427	0	0.0912016	0.329244	0.166882	0	0.207913	0.17744	0.145978	0	0.000549056	0	0.175213	0	0.254166	0.158011	0.381149	0.121894	0.135296	0.128459
		local	0.267977	0.987472	0.635675	0.61441	0.85427	0.0187378	0.0749585	0.817603	0.219203	0.486737	0.16948	0.0883507	0.885568	0.979871	0.23192	0.321191	0.24561	0.447674	0.275577	0.360079	0.512244	0.883815	0.96912	0.99597	0.373111	0.579662	0.524765	0.590637	0.958814	0.505833	0.812242	0.996254	0.944431	0.519437	0.556222	0.472979	0.0022454	0.125671	1	0.961324	1	0.979874	0.762086	0.774495	0.481857	0.432672	0.478478
		distal	0.732023	0.0125284	0.364325	0.38559	0.14573	0.981262	0.925042	0.182397	0.780797	0.513263	0.83052	0.911649	0.114432	0.0201289	0.76808	0.678809	0.75439	0.552326	0.724423	0.639921	0.487756	0.116185	0.03088	0.00403027	0.626889	0.420338	0.475235	0.409363	0.0411864	0.494167	0.187758	0.00374627	0.0555693	0.480563	0.443778	0.527021	0.997755	0.874329	0	0.0386758	0	0.0201256	0.237914	0.225505	0.518143	0.567328	0.521522
			1
		Cross-correlation	0.920315	0.975022	0.757368	0.858436	0.929309	0.836205	0.889953	0.853768	0.906875	0.712334	0.929419	0.924854	0.791563	0.968476	0.968264	0.955443	0.968984	0.726629	0.862506	0.756344	0.838998	0.606294	0.980765	0.981071	0.84414	0.960285	0.907941	0.841597	0.9438	0.889716	0.85246	0.995572	0.92571	0.884527	0.867727	0.921959	0.74702	0.854157	0.974981	0.895159	0.973363	0.946586	0.949052	0.897357	0.952337	0.793523	0.938277
		Likeness	0.842511	0.846782	0.706307	0.779881	0.835413	0.733704	0.786556	0.729748	0.842143	0.75885	0.846084	0.823273	0.701074	0.885909	0.911006	0.8923	0.908698	0.751268	0.818308	0.758793	0.785779	0.631201	0.848964	0.863025	0.820905	0.885659	0.858263	0.826401	0.834608	0.844707	0.787701	0.947468	0.820956	0.837108	0.829913	0.871962	0.706801	0.813473	0.88012	0.778866	0.875668	0.839608	0.863256	0.810339	0.906992	0.761042	0.883078
		Kuiper V Value	0.0437048	0.103171	0.212197	0.0856555	0.11646	0.219217	0.183785	0.147995	0.0685947	0.114626	0.0369051	0.0717068	0.171717	0.0593115	0.0409799	0.0398149	0.0318585	0.0889509	0.0560915	0.0712855	0.0703312	0.336092	0.126678	0.115148	0.0725356	0.0306282	0.0473859	0.0786881	0.129626	0.0546946	0.159804	0.0319429	0.103626	0.0667187	0.0409999	0.0452158	0.2386	0.0582979	0.0936259	0.16955	0.110756	0.0884752	0.0527294	0.105712	0.0373511	0.10568	0.0462406
		KS D Value	0.029962	0.0839236	0.197619	0.0652918	0.0955206	0.178839	0.156816	0.0831419	0.040293	0.110148	0.0318071	0.0512303	0.142067	0.05663	0.0211502	0.0274985	0.0278297	0.0761304	0.0553814	0.046358	0.0433206	0.245148	0.108931	0.0991166	0.0385781	0.022445	0.0288209	0.0688124	0.105318	0.0543852	0.102717	0.0209853	0.0617005	0.0424026	0.0253909	0.0371681	0.202461	0.0558462	0.0518181	0.140321	0.0779764	0.0778364	0.0333322	0.0863531	0.019859	0.084824	0.0278678
Dzmix	RESULTS_OUT_R2	proportions	180721FL1	BDJ1ES1	Leadville SG.	SJMT1	Temple Butte SG.	Tonka	Wood River Basin SG.	08BC-1/2	09-CM-699	10DM14	180713SWC3	BCRA-01-10	BDJLS1	CC01	Molas SG.	Surprise Canyon SG.	Tensus-Dimple SG.	06GC147	10DM15	13ROB-1	18BH1	1BDK480	SNFUM1	Cutler_south SG	1MHRCT201	1PL-534	1PS-4	1QZ19	2PCGT180	2QZ-9	2RFMMT3	3FTCT166	4SMST778	5PS-42	5PS-58	5PS-82	Battle	CO-PR2-0.2	CT1	Cutler 1 SG.	Cutler 2 SG.	Cutler 3 SG.	Eagle Valley SG. 1	Eagle Valley SG. 2	Earp-Horquilla SG.	ECS-13-2	Esplanade SG.
		Triassic Arc	0.00708286	0.00397209	0.0145561	0.013747	0.0190833	0.000773912	0.00388826	0.0102315	0.0114278	0.0123151	0.0219972	0.00792373	0.013129	0.0196188	0.00561661	0.0130312	0.0055921	0.00999053	0.0170787	0.01112	0.015948	0.0273428	0.0135597	0.0179348	0.01576	0.0112513	0.0205932	0.00751964	0.00172144	0.0104452	0.0129912	0.0094564	0.0151836	0.00638006	0.0167534	0.0186209	0.00275523	0.00847864	0.0117179	0.00964003	0.00892548	0.0188231	0.0145079	0.00951151	0.00985307	0.00863526	0.0174702
		central App.	0.724162	0.0483964	0.0772519	0.0415008	0.0241922	0.00113343	0.00541348	0.0637751	0.852275	0.140473	0.683087	0.905221	0.0489578	0.0455582	0.835893	0.747874	0.811961	0.435425	0.393785	0.276854	0.366639	0.0623726	0.00949026	0.0411016	0.110996	0.343885	0.440065	0.402355	0.0111741	0.37737	0.0358419	0.0526176	0.0650253	0.457797	0.397711	0.610858	0.00266748	0.348419	0.0356184	0.0353	0.0193286	0.0381482	0.118398	0.0613259	0.445479	0.676895	0.454883
		Maya Block, SF	0.0118637	0.0253475	0.0311996	0.044752	0.0218018	0.00427737	0.00627563	0.032111	0.0326993	0.089038	0.0221271	0.00658961	0.0605771	0.0597838	0.0234173	0.0194372	0.0531158	0.0169959	0.0444464	0.355621	0.0469563	0.0642829	0.0341195	0.0295686	0.512644	0.0590925	0.0239245	0.035816	0.00814648	0.11613	0.0516825	0.0329271	0.0222154	0.0300916	0.0203775	0.0115255	0.00133665	0.425977	0.0249094	0.0264214	0.0372813	0.067748	0.0218719	0.0817548	0.0417474	0.029893	0.0393326
		Maya Block, Mc	0.0805357	0.0226739	0.0170563	0.0207045	0.0207395	0.00374882	0.000700004	0.0176656	0.0420044	0.105399	0.131956	0.00471905	0.00629193	0.0159343	0.0579701	0.00805212	0.00652085	0.0160339	0.0343725	0.0144977	0.0235306	0.0108036	0.0189298	0.0161817	0.0752376	0.0170454	0.0170835	0.0285422	0.00152285	0.0580553	0.0196438	0.00607592	0.0204002	0.0149596	0.0299833	0.0108112	0.00194343	0.0697091	0.0136014	0.0180448	0.00997973	0.032658	0.0188782	0.0140219	0.0190341	0.00924343	0.0151824
		Antler recycled	0.0152971	0.0183332	0.308244	0.427378	0.112318	0.95965	0.958121	0.0790525	0.00808084	0.133192	0.0370992	0.0386664	0.00658202	0.0174751	0.0120942	0.0177488	0.0184333	0.146635	0.379601	0.0643319	0.190696	0.0154081	0.0521789	0.0398585	0.0213436	0.036447	0.0504501	0.105501	0.00402371	0.022534	0.125596	0.0622092	0.0500142	0.116172	0.0612604	0.0654086	0.947154	0.0283618	0.0423417	0.0191899	0.00573415	0.064633	0.0656563	0.0640756	0.060974	0.0278404	0.130324
		Archean & Proterozoic	0.0415688	0.0216496	0.0442179	0.0419049	0.0394152	0.00690637	0.00605741	0.00969551	0.00500039	0.0928366	0.0232961	0.0117411	0.0161632	0.0144609	0.0185897	0.0237242	0.0323042	0.0349911	0.0280668	0.0386932	0.0165614	0.0248935	0.0142603	0.0407379	0.0332057	0.0501277	0.0913828	0.0519415	0.00603665	0.0427175	0.0256125	0.0457747	0.0371055	0.0554506	0.052495	0.0446774	0.0300323	0.0536212	0.0197872	0.0214422	0.0106879	0.0397438	0.0956881	0.0453115	0.0770961	0.0836023	0.0377979
		1.73 Ga	0.0152031	0.0249008	0.209027	0.232802	0.29784	0.00334807	0.00229749	0.0188309	0.00346343	0.0242118	0.0105482	0.00525168	0.00672919	0.0938148	0.0120337	0.0255735	0.0160263	0.0558862	0.0306765	0.0204687	0.0617628	0.0189329	0.0589463	0.103837	0.026232	0.0945613	0.0726403	0.0549294	0.00359005	0.0521835	0.23063	0.0648769	0.0346979	0.117318	0.108098	0.0570713	0.00120306	0.01311	0.0220617	0.125993	0.0319767	0.178405	0.106885	0.358134	0.0747105	0.02314	0.0642296
		1.70 Ga	0.0314772	0.415088	0.0240468	0.0224988	0.224769	0.0084918	0.00595538	0.205485	0.012372	0.0212005	0.0124853	0.00426032	0.00268181	0.265585	0.00602297	0.0390585	0.0102406	0.128684	0.0126305	0.0214444	0.0241446	0.165068	0.485328	0.412644	0.0408525	0.0577964	0.0540862	0.0218806	0.00584675	0.0294238	0.0948131	0.335465	0.124366	0.0177244	0.0284641	0.0105093	0.00280948	0.0111197	0.142712	0.0555407	0.0117603	0.075405	0.143003	0.271004	0.0368425	0.0161953	0.0374524
		1.66 Ga	0.0383104	0.389564	0.0169311	0.0356781	0.0596088	0.0068564	0.00724522	0.46699	0.00761044	0.295364	0.0368391	0.00682813	0.752009	0.039596	0.0139213	0.0641414	0.0212772	0.108413	0.0355151	0.152413	0.211858	0.452539	0.280969	0.249889	0.106721	0.292947	0.180533	0.249582	0.0048736	0.250616	0.0565118	0.020952	0.272926	0.126838	0.233623	0.147546	0.00428801	0.0226486	0.0927098	0.00814235	0.00840467	0.028075	0.190843	0.0196455	0.213723	0.087678	0.146209
		1.43 Ga	0.0154612	0.0168286	0.225944	0.0973818	0.162844	0.00331977	0.00284885	0.0813137	0.00426844	0.0336306	0.0083389	0.00443088	0.0216093	0.391396	0.00821545	0.0312286	0.0045408	0.0370316	0.0104168	0.00899319	0.0263422	0.145378	0.0144723	0.0189388	0.0187355	0.0111388	0.0174772	0.0313743	0.950075	0.0312109	0.327629	0.355804	0.269295	0.0436432	0.0361254	0.014762	0.00190077	0.00723819	0.586524	0.668661	0.846297	0.152103	0.207405	0.063242	0.00639984	0.0152552	0.0406941
		530 Ga	0.0190384	0.0132453	0.0315246	0.021652	0.017387	0.00149379	0.00119697	0.0148485	0.0207982	0.0523391	0.0122261	0.00436827	0.0652698	0.0367772	0.00622627	0.0101307	0.0199876	0.00991375	0.0134103	0.0355636	0.0155607	0.0129787	0.0177462	0.0293078	0.0382718	0.0257084	0.0317636	0.0105584	0.00298966	0.00931378	0.019048	0.0138407	0.0887715	0.0136251	0.0151085	0.00821014	0.00390999	0.0113163	0.00801639	0.0116249	0.00962375	0.304258	0.0168639	0.0119734	0.01414	0.0216217	0.0164246
		local	0.11949	0.859627	0.507474	0.410012	0.76245	0.0235098	0.0195439	0.787469	0.0485124	0.426746	0.0804376	0.0251393	0.848299	0.827169	0.0464196	0.170133	0.0720726	0.339929	0.102649	0.238883	0.339669	0.794897	0.857462	0.814617	0.230813	0.482152	0.356501	0.368325	0.967375	0.372748	0.728632	0.790939	0.790056	0.319149	0.42142	0.238099	0.0141113	0.0654328	0.852024	0.869962	0.908063	0.738246	0.665	0.723999	0.345816	0.16389	0.30501
		distal	0.88051	0.140373	0.492526	0.589988	0.23755	0.97649	0.980456	0.212531	0.951488	0.573254	0.919562	0.974861	0.151701	0.172831	0.95358	0.829867	0.927927	0.660071	0.897351	0.761117	0.660331	0.205103	0.142538	0.185383	0.769187	0.517848	0.643499	0.631675	0.0326252	0.627252	0.271368	0.209061	0.209944	0.680851	0.57858	0.761901	0.985889	0.934567	0.147976	0.130038	0.0919372	0.261754	0.335	0.276001	0.654184	0.83611	0.69499
	RESULTS_OUT_V	Triassic Arc	0.0396654	0.029818	0.0191586	0.0186018	0.0471358	0.00441989	0.00350204	0.0286348	0.0118774	0.0620695	0.0299987	0.0127387	0.0131181	0.00824871	0.0410591	0.0109781	0.0107398	0.018717	0.0509185	0.0255636	0.0181322	0.0149216	0.0315227	0.0161621	0.020038	0.0115305	0.014951	0.017493	0.0166387	0.0284219	0.0197951	0.0375489	0.0299293	0.0157602	0.0265601	0.0149536	0.00790625	0.0227973	0.0142032	0.00677828	0.0163696	0.0558614	0.0160515	0.0173972	0.0118156	0.0269977	0.0187318
		central App.	0.587854	0.035652	0.069661	0.0241905	0.0301339	0.00150738	0.00466255	0.082875	0.757402	0.115994	0.592594	0.859416	0.229701	0.105951	0.7203	0.704783	0.682559	0.280313	0.256382	0.443579	0.307157	0.379039	0.0179186	0.0435079	0.136475	0.277043	0.348118	0.171673	0.255582	0.353043	0.12937	0.0308366	0.0651718	0.3803	0.239185	0.377688	0.0153377	0.222241	0.0446696	0.257858	0.0905482	0.06899	0.114913	0.0863367	0.329955	0.463948	0.346032
		Maya Block, SF	0.0124712	0.039576	0.0249689	0.0463934	0.0312222	0.00152025	0.0051238	0.0759021	0.0585194	0.113756	0.0705664	0.00623601	0.0133052	0.0737982	0.0323141	0.00771111	0.0805885	0.01461	0.0326011	0.102485	0.0692004	0.0388519	0.0130528	0.0065708	0.319417	0.0517416	0.0312926	0.0636523	0.023147	0.0931047	0.098437	0.0445856	0.0571768	0.0230692	0.0640389	0.0449114	0.0108072	0.516825	0.0363938	0.159922	0.0333283	0.0318239	0.0295754	0.0836292	0.0670184	0.0231373	0.0217209
		Maya Block, Mc	0.0447626	0.0113711	0.0234924	0.0341176	0.0199027	0.0122729	0.00067642	0.0355181	0.0404201	0.0551378	0.0532863	0.0315605	0.0393512	0.0406038	0.0254098	0.00697533	0.0252223	0.03123	0.0202425	0.0285323	0.016026	0.00870052	0.0189812	0.0118181	0.0874844	0.0186342	0.0313057	0.029419	0.00630997	0.0369529	0.0215409	0.0283973	0.0187314	0.0202285	0.0297824	0.0199623	0.00631044	0.0337912	0.0334595	0.0110234	0.0390923	0.0470393	0.0329604	0.0327648	0.0393349	0.0290042	0.0139842
		Antler recycled	0.0544812	0.0332538	0.242061	0.345398	0.114578	0.948435	0.955651	0.0314972	0.0112586	0.169853	0.0799377	0.0221224	0.0196396	0.0337832	0.0484921	0.0215275	0.0318655	0.157341	0.329922	0.0951043	0.164207	0.0100487	0.0483126	0.022631	0.0509212	0.0663151	0.133778	0.0869135	0.0144548	0.0646356	0.0630066	0.0542568	0.0384893	0.130895	0.093029	0.0489762	0.885128	0.0221994	0.0151777	0.0265638	0.0267529	0.0474391	0.0546995	0.080632	0.0704319	0.0314487	0.10154
		Archean & Proterozoic	0.0622294	0.036664	0.0578	0.0507286	0.0575924	0.00591277	0.00439675	0.0648856	0.0150114	0.125921	0.0444284	0.0317444	0.0869395	0.0549694	0.0268254	0.0498881	0.0676078	0.103273	0.0777618	0.0686968	0.0407003	0.0811059	0.0280248	0.0399222	0.0933642	0.116369	0.0738238	0.18262	0.125235	0.0812421	0.0744797	0.0237782	0.0513057	0.0895222	0.147906	0.119562	0.0384182	0.0711208	0.0454871	0.0305793	0.0560144	0.0585356	0.1083	0.0904665	0.171521	0.0850147	0.137021
		1.73 Ga	0.0287308	0.048451	0.185976	0.115246	0.217098	0.00257955	0.00222503	0.0452652	0.0165641	0.0236171	0.0249052	0.00209517	0.0199215	0.053393	0.0257237	0.0308626	0.0232282	0.0711852	0.0369106	0.0387708	0.0450408	0.027421	0.139362	0.0869343	0.0236487	0.0725474	0.0714297	0.0326227	0.0213251	0.0270822	0.0825451	0.0349555	0.0243601	0.0647389	0.0423131	0.0827559	0.0025559	0.035733	0.0478091	0.0356396	0.0412497	0.120857	0.0612041	0.228615	0.0503472	0.0477447	0.0484159
		1.70 Ga	0.0482818	0.268667	0.089497	0.107952	0.169148	0.00768925	0.0131982	0.151679	0.0163317	0.0267188	0.0441417	0.00711963	0.021302	0.161128	0.0168043	0.0517905	0.0166584	0.0971086	0.0495328	0.0540248	0.0286008	0.0190499	0.368222	0.435171	0.0503949	0.0550848	0.0342571	0.0349246	0.00880025	0.0261973	0.157139	0.302	0.0325357	0.0660787	0.0641872	0.041246	0.00437423	0.0197031	0.0579579	0.173339	0.0849898	0.134167	0.0949188	0.234435	0.022776	0.0204337	0.0630901
		1.66 Ga	0.0544271	0.411138	0.0708974	0.0991367	0.153872	0.00792321	0.00806058	0.374766	0.0114979	0.210711	0.0144832	0.00808923	0.277062	0.223342	0.00971407	0.059488	0.015342	0.0849097	0.0399931	0.0833703	0.211902	0.162728	0.295621	0.262868	0.11074	0.21889	0.173273	0.247303	0.00892208	0.189948	0.207468	0.176981	0.354974	0.122561	0.166879	0.153332	0.0096832	0.0295619	0.273362	0.0438096	0.0386321	0.0889552	0.253349	0.0621621	0.18883	0.130661	0.14427
		1.43 Ga	0.0427922	0.0593664	0.162092	0.135654	0.133185	0.00310829	0.0021837	0.0843492	0.024752	0.0704789	0.0237725	0.00481241	0.260038	0.213339	0.0271002	0.0412851	0.014711	0.121176	0.0543832	0.0261185	0.0777556	0.245883	0.0172337	0.0441101	0.0448363	0.0798499	0.067032	0.106754	0.511813	0.0726968	0.135225	0.246246	0.248991	0.071206	0.098301	0.0719543	0.0100274	0.0167581	0.418858	0.243302	0.544279	0.0976182	0.191494	0.0637896	0.033214	0.122724	0.0773122
		530 Ga	0.0243041	0.0260428	0.0543959	0.0225814	0.0261319	0.00463153	0.000319519	0.024627	0.0363651	0.0257426	0.0218852	0.0140652	0.0196226	0.0314426	0.026257	0.0147104	0.0314777	0.0201371	0.0513521	0.0337545	0.0212788	0.0122508	0.0217482	0.0303043	0.06268	0.0319945	0.0207388	0.026624	0.00777191	0.0266759	0.0109935	0.0204141	0.0783346	0.0156401	0.0278186	0.024659	0.0094516	0.00926902	0.0126225	0.0111856	0.0287441	0.248713	0.042533	0.0197715	0.0147566	0.018886	0.0278815
		local	0.198536	0.813665	0.562858	0.48057	0.699435	0.0259318	0.0259871	0.680687	0.105511	0.357269	0.129188	0.0361816	0.597946	0.682646	0.105599	0.198137	0.101417	0.394517	0.232172	0.236039	0.384577	0.467333	0.842187	0.859388	0.2923	0.458367	0.36673	0.448229	0.558632	0.3426	0.593371	0.780597	0.739196	0.340225	0.399499	0.373947	0.0360923	0.111025	0.810609	0.507276	0.737894	0.690311	0.6435	0.608774	0.309924	0.34045	0.36097
		distal	0.801464	0.186335	0.437142	0.51943	0.300565	0.974068	0.974013	0.319313	0.894489	0.642731	0.870812	0.963818	0.402054	0.317354	0.894401	0.801863	0.898583	0.605483	0.767828	0.763961	0.615423	0.532667	0.157813	0.140612	0.7077	0.541633	0.63327	0.551771	0.441368	0.6574	0.406629	0.219403	0.260804	0.659775	0.600501	0.626053	0.963908	0.888975	0.189391	0.492724	0.262106	0.309689	0.3565	0.391226	0.690076	0.65955	0.63903
	RESULTS_OUT_D	Triassic Arc	0.0130179	0.00567561	0.0110667	0.026714	0.041054	0.00439594	0.00363165	0.0429254	0.028692	0.0250766	0.0229142	0.0123765	0.0651507	0.0268068	0.0289784	0.00634797	0.0137311	0.014684	0.0287671	0.0184336	0.0249114	0.032362	0.0264262	0.0177055	0.0411555	0.0133506	0.0187468	0.0249676	0.0760586	0.0254098	0.0216605	0.0142476	0.0241261	0.0291195	0.0186141	0.0256277	0.00179079	0.0140839	0.029891	0.0658521	0.0398179	0.0645479	0.0156719	0.0346227	0.0242038	0.0108142	0.0256598
		central App.	0.593619	0.051392	0.0434281	0.0246607	0.0326973	0.00121144	0.00572836	0.0390818	0.787364	0.115668	0.59197	0.841393	0.0938809	0.0460362	0.67972	0.610074	0.70693	0.170038	0.199456	0.384992	0.219859	0.133856	0.0309114	0.0206059	0.167822	0.260825	0.261913	0.117341	0.0771275	0.324049	0.0343707	0.0308444	0.0632609	0.14738	0.173554	0.284299	0.00244399	0.175497	0.0304853	0.056604	0.0441387	0.0509301	0.0704646	0.090815	0.302242	0.36067	0.271526
		Maya Block, SF	0.0429825	0.0254211	0.0396289	0.0339365	0.0675067	0.00440204	0.00611127	0.058474	0.0350253	0.106898	0.0550952	0.0153749	0.109394	0.0477656	0.0488964	0.0218057	0.0416905	0.0537971	0.0464065	0.169274	0.0284464	0.0413714	0.00652342	0.0143309	0.235741	0.0914764	0.0468399	0.0471571	0.0236281	0.0704414	0.0364434	0.0461247	0.0405893	0.0321913	0.0616604	0.0246564	0.00453204	0.567881	0.0420673	0.070406	0.0477911	0.0465406	0.0146178	0.0562657	0.0431178	0.04137	0.0323183
		Maya Block, Mc	0.0206411	0.0224004	0.0328014	0.0171298	0.0164763	0.0125678	0.00113883	0.0246507	0.035922	0.0617868	0.0470391	0.0229025	0.0566646	0.0351729	0.0261999	0.0176272	0.0312202	0.0248969	0.0539738	0.0284023	0.0201611	0.0556507	0.0182599	0.011408	0.101961	0.0201871	0.0105186	0.0560172	0.0554269	0.0385828	0.0329115	0.0151569	0.0165366	0.0201018	0.0387334	0.0149662	0.00351907	0.0173665	0.0150141	0.00702867	0.0361642	0.0313253	0.039528	0.0206857	0.0224266	0.0265732	0.0233153
		Antler recycled	0.0678913	0.0234167	0.255688	0.420796	0.14106	0.940287	0.938056	0.0441108	0.011241	0.198707	0.0916376	0.0201129	0.0174822	0.0431282	0.0482566	0.043409	0.0503768	0.171393	0.347251	0.0842838	0.170409	0.0382593	0.0637142	0.0248819	0.0467363	0.0507035	0.143615	0.105958	0.0487697	0.0721171	0.174135	0.0556222	0.0231174	0.0497925	0.0851471	0.129949	0.909228	0.0234427	0.027881	0.0924635	0.0654786	0.0438627	0.07453	0.0625123	0.109893	0.082845	0.146751
		Archean & Proterozoic	0.0452497	0.0602785	0.0510395	0.077181	0.0717627	0.0067962	0.0130909	0.0703914	0.0239504	0.176049	0.069211	0.0415215	0.0840652	0.0581872	0.0207082	0.0865928	0.0563009	0.150585	0.106778	0.0819527	0.0967293	0.0863807	0.0252337	0.0763971	0.0452671	0.121343	0.134324	0.184712	0.0697824	0.134089	0.120109	0.0371414	0.0769877	0.285139	0.18157	0.192361	0.0677578	0.0616236	0.0432332	0.0876203	0.0510349	0.0776404	0.141855	0.133334	0.179968	0.101835	0.131056
		1.73 Ga	0.0342166	0.0471692	0.136419	0.0779729	0.20509	0.00347811	0.00353132	0.0802431	0.00809822	0.0423296	0.0230123	0.00644605	0.0250784	0.0973388	0.0335241	0.0521981	0.0212933	0.0888729	0.0504115	0.0635218	0.105218	0.0189121	0.166226	0.126024	0.0447502	0.101126	0.0809206	0.064664	0.0168048	0.0380159	0.144953	0.0644298	0.0239902	0.0916708	0.039945	0.0401256	0.00167601	0.0561303	0.0377913	0.105605	0.0496871	0.108787	0.0658428	0.23052	0.0315166	0.0322984	0.0709271
		1.70 Ga	0.0538934	0.334875	0.108812	0.100958	0.151311	0.0103065	0.0139506	0.101814	0.0172955	0.0517151	0.0258989	0.00481176	0.0642143	0.140749	0.0135522	0.0442147	0.0187982	0.0512876	0.0449277	0.0635276	0.0486891	0.0588424	0.407317	0.429639	0.0549155	0.0362663	0.0756872	0.0561223	0.0255942	0.0310078	0.148088	0.34892	0.0525672	0.0777489	0.0530008	0.0359291	0.00203408	0.0228326	0.0345132	0.104713	0.0651534	0.127943	0.126928	0.205158	0.0469684	0.0484509	0.0598339
		1.66 Ga	0.0593608	0.378951	0.0873556	0.130438	0.188256	0.00793779	0.00921039	0.425134	0.0117092	0.15797	0.0253198	0.0085505	0.129881	0.237724	0.0278774	0.0697452	0.0247395	0.10609	0.0477951	0.0440095	0.143815	0.233907	0.214913	0.215419	0.104938	0.215448	0.129638	0.187142	0.0521076	0.168357	0.147621	0.131644	0.326864	0.121771	0.230212	0.146934	0.00384315	0.0217126	0.301697	0.134372	0.0354652	0.124606	0.218962	0.0921065	0.15946	0.130492	0.131426
		1.43 Ga	0.0441469	0.0320279	0.185602	0.0686598	0.0649292	0.00376282	0.00347791	0.0756847	0.0143485	0.0456697	0.0281403	0.0136712	0.309651	0.225305	0.0359673	0.0408717	0.0104135	0.14777	0.0462877	0.034466	0.10202	0.276289	0.0182919	0.0329287	0.0616456	0.0594308	0.0741572	0.119751	0.537548	0.0682759	0.117995	0.232675	0.238642	0.114351	0.10331	0.0809517	0.00123829	0.0303425	0.405871	0.26007	0.545111	0.0946749	0.208902	0.0444735	0.0536094	0.140286	0.0913212
		530 Ga	0.0249806	0.0183931	0.048158	0.0215525	0.0198568	0.0048545	0.0020725	0.0374896	0.0263537	0.0181308	0.0197621	0.0128392	0.0445379	0.0417865	0.0363195	0.00711409	0.0245061	0.020584	0.0279453	0.0271364	0.0397414	0.0241688	0.0221826	0.0306601	0.0950684	0.0298426	0.0236409	0.036167	0.0171522	0.029654	0.0217137	0.0231945	0.113318	0.0307337	0.0142537	0.0242011	0.00193712	0.00908739	0.0315559	0.0152647	0.0201575	0.229142	0.0226988	0.0295072	0.0265945	0.0243646	0.0158658
		local	0.216598	0.811416	0.566347	0.399582	0.629443	0.0303398	0.0322428	0.720366	0.0778051	0.315815	0.122133	0.0463187	0.573362	0.742903	0.147241	0.214144	0.0997507	0.414605	0.217367	0.232661	0.439483	0.61212	0.828931	0.834671	0.361318	0.442114	0.384044	0.463847	0.649207	0.335311	0.580371	0.800863	0.755382	0.436275	0.440721	0.328141	0.0107287	0.140105	0.811428	0.620025	0.715575	0.685153	0.643332	0.601765	0.318149	0.375892	0.369374
		distal	0.783402	0.188584	0.433653	0.600418	0.370557	0.96966	0.967757	0.279634	0.922195	0.684185	0.877867	0.953681	0.426638	0.257097	0.852759	0.785856	0.900249	0.585395	0.782633	0.767339	0.560517	0.38788	0.171069	0.165329	0.638682	0.557886	0.615956	0.536153	0.350793	0.664689	0.419629	0.199137	0.244618	0.563725	0.559279	0.671859	0.989271	0.859895	0.188572	0.379975	0.284425	0.314847	0.356668	0.398235	0.681851	0.624108	0.630626
		R2 mean	0.660421	0.955415	0.428675	0.575447	0.807474	0.900607	0.929054	0.90689	0.695946	0.454911	0.716734	0.743703	0.49054	0.865321	0.822319	0.767609	0.813777	0.476781	0.491179	0.454635	0.480234	0.344326	0.94789	0.946752	0.684035	0.821063	0.597675	0.531222	0.832787	0.678122	0.578528	0.910379	0.793506	0.519298	0.559678	0.579706	0.901491	0.541837	0.90691	0.809423	0.974053	0.78773	0.780775	0.923946	0.733616	0.595669	0.643668
		V mean	0.138989	0.227037	0.300634	0.212825	0.218772	0.116618	0.103661	0.171866	0.135789	0.183973	0.138969	0.170468	0.334088	0.287933	0.101018	0.127261	0.0905757	0.194482	0.138605	0.147065	0.187958	0.495855	0.241836	0.242061	0.117646	0.147868	0.163207	0.210698	0.490231	0.152535	0.3423	0.264918	0.233097	0.195173	0.185635	0.18877	0.138772	0.150006	0.34166	0.586472	0.366709	0.226841	0.22455	0.183119	0.138495	0.200137	0.169908
		D mean	0.0883592	0.142165	0.164832	0.138502	0.132799	0.070573	0.0689721	0.102087	0.0790168	0.106792	0.0810332	0.103464	0.184125	0.15309	0.0622134	0.0871197	0.0619853	0.12209	0.0892145	0.0849359	0.108875	0.257978	0.149458	0.15056	0.0733068	0.0872785	0.102713	0.12434	0.251992	0.0889154	0.187409	0.158947	0.135424	0.119173	0.111199	0.122522	0.106318	0.0924157	0.200588	0.296835	0.207792	0.126144	0.13313	0.114826	0.084089	0.129294	0.106285
[truncated: 150 more columns]

## Sheet: 11 sources+1.085Ga
DZnmf (11 source factorization)
	empirical source hypotheses	factorized sources	180721FL1	BDJ1ES1	Leadville SG.	SJMT1	Temple Butte SG.	Tonka	Wood River Basin SG.	08BC-1/2	09-CM-699	10DM14	180713SWC3	BCRA-01-10	BDJLS1	CC01	Molas SG.	Surprise Canyon SG.	Tensus-Dimple SG.	06GC147	10DM15	13ROB-1	18BH1	1BDK480	SNFUM1	Cutler_south SG	1MHRCT201	1PL-534	1PS-4	1QZ19	2PCGT180	2QZ-9	2RFMMT3	3FTCT166	4SMST778	5PS-42	5PS-58	5PS-82	Battle	CO-PR2-0.2	CT1	Cutler 1 SG.	Cutler 2 SG.	Cutler 3 SG.	Eagle Valley SG. 1	Eagle Valley SG. 2	Earp-Horquilla SG.	ECS-13-2	Esplanade SG.
	1.70 Ga	WS6	0.0342402	0.453042	0.039789	0.0536077	0.260933	0.00022002	0.00918088	0.259836	0	0.0226057	0.0201669	0.0108645	0	0.311793	0.0152643	0.0583538	0	0.111146	0	0.0331074	0.010353	0.136174	0.596499	0.598576	0.0490693	0.103971	0.0543894	0	0	0.0394884	0.127008	0.394111	0.187652	0.00544601	0.01757	0	0.0022454	0.0171671	0.163244	0.0936996	0.0539969	0.170496	0.176339	0.330446	0.0341103	0	0.0540424
	Triassic Arc	WS9	0	0.000226504	0	0	0	0	0	0.00947469	0	0.00932228	0	0	0.016088	0.0147774	0	0	0	0	0.00117736	0	0.0116219	0	0	0	0.00489523	0	0	0.00198091	0	0	0.0205856	0	0	0	0.00335002	0.00258144	0	0	0	0.0386758	0	0	0.00409647	0	0.00204896	0.0072715	0
	1.09 Ga	WS1* (FS12)	0.144983	0.0128198	0.0300582	0.011571	0.0087469	0.00284007	0.00200304	0.037159	0.130744	0.0216523	0.121979	0.302685	0	0	0.145208	0.173428	0.164128	0.112866	0.136226	0.059569	0.0816257	0	0.00256296	0	0.0450239	0.0674939	0.0977272	0.0773178	0	0.0596934	0	0	0	0.101421	0.0891928	0.144056	0.0167581	0.0719636	0	0	0	0	0.0856409	0.0518367	0.0966977	0.161163	0.148335
	central Appalachian	WS2	0.344777	0	0.0611741	0.010938	0.0163323	0	0	0.0325524	0.404841	0.0428428	0.347446	0.569233	0	0	0.375168	0.432856	0.390475	0.265989	0.186139	0.196168	0.164019	0.00949454	0	0	0.0774181	0.155387	0.234364	0.122875	0.00361319	0.140785	0	0	0	0.234591	0.177783	0.304646	0.0455011	0.187449	0	0	0	0	0.152889	0.101642	0.177708	0.350551	0.273961
	1.66 Ga	WS1	0.114676	0.524959	0.11622	0.115488	0.0590319	0	0.00154575	0.468623	0.0839024	0.289166	0.103334	0.018794	0.817743	0	0.0916746	0.114592	0.116409	0.187616	0.106288	0.227473	0.280851	0.616616	0.265534	0.290527	0.157088	0.343092	0.286629	0.358392	0.0807064	0.296767	0.059417	0	0.318858	0.244798	0.307457	0.286288	0	0.084157	0.181446	0	0	0	0.23265	0	0.283892	0.262839	0.247101
	1.43 Ga	WS8	0.0391285	0.00947084	0.17398	0.0966335	0.161462	0.00277721	0	0.0838277	0.0700653	0.0550721	0.00420846	0.0386927	0.0128287	0.453115	0.0757317	0.0921232	0.0288873	0.0580966	0.0426293	0	0.0345836	0.126893	0	0	0.0397421	0.0109057	0.00913195	0.0620665	0.878107	0.0529719	0.296573	0.43526	0.317706	0.0612801	0.0537557	0.0368436	0	0.00860336	0.65531	0.692412	0.946003	0.223092	0.191632	0.0477753	0.0280075	0.0264882	0.0488754
	Antler recycled	WS5	0.0404208	0.0123019	0.303151	0.365239	0.116584	0.951361	0.904544	0.0874209	0.0245532	0.172048	0.0670157	0.129126	0	0	0.0226858	0.0742734	0.0575731	0.23356	0.344064	0.0854467	0.193705	0	0.0216586	0	0.0599759	0.0700961	0.120526	0.107665	0	0.038237	0.152229	0	0	0.161313	0.109398	0.12266	0.844584	0.0629004	0	0	0	0.00318938	0.0603527	0.0172201	0.116605	0.0449105	0.172828
	530 Ma	WS10	0.00723626	0	0.00289548	0	0.0256102	0	0.00221157	0.00531677	0.0360143	0.0556154	0.00229469	0.0199995	0.0549963	0.079448	0.0256509	0.00817889	0.0338793	0	0.0279663	0.0356331	0	0.00413233	0	0	0.0812373	0.0210008	0.00373225	0.00375115	0	0.0254035	0	0	0.120215	0	0	0.00386947	0	0.0151946	0	0	0	0.33212	0.00345356	0.0151248	0.0139521	0.00804901	0
	Maya Block, Macal Fm.	WS3	0.26869	0	0	0	0	0	0	0.0251197	0.317947	0.16248	0.34922	0.197971	0.0128559	0.00535154	0.2772	0.128701	0.167774	0.0185203	0.150262	0.0369744	0.0602759	0	0	0	0.20633	0.0858174	0.0506509	0.10777	0.00304487	0.134663	0.00913188	0	0.0555693	0.0572796	0.0710819	0.0490636	0	0.237602	0	0	0	0.0169362	0	0.0141586	0.0950459	0.0883946	0.0545833
	Maya Block, Santa Fe Fm.	WS7	0	0	0	0.000746969	0	0.0127915	0.00352938	0.0278294	0.0243265	0.0488697	0	0	0.0557653	0	0.0536864	0.0283738	0.106777	0.0342566	0	0.307659	0.0581345	0	0.00922133	0.00403027	0.269453	0.0810815	0.0169689	0.0182163	0	0.15243	0	0.00374627	0	0	0.0153417	0.00167519	0.00287574	0.330727	0	0	0	0	0.00803698	0.069918	0.0760284	0	0
	early Paleozoic recycled	WS11	0.0781348	0	0	0.00866611	0.0128144	0.0171096	0.0169686	0	0.00912875	0.077701	0.0668388	0.01532	0.0297227	0	0.0393406	0.0146043	0.0317914	0	0.04278	0.0136722	0	0.10669	0	0	0.00881704	0.0279553	0.0527244	0.0508558	0.0345283	0.0280525	0.00581128	0	0	0.0273789	0.0668225	0.0463951	0.104794	0.0556506	0	0	0	0	0.0125391	0.022566	0.0507073	0.0762005	0.0201495
	1.73 Ga	WS4	0.0726956	0	0.30279	0.34868	0.347233	0.0157406	0.0620203	0	0.0292214	0.0642779	0.0394751	0	0	0.135515	0.0235986	0.0479435	0.0664341	0.090816	0.098694	0.0638659	0.186456	0	0.107087	0.106866	0.0459737	0.100693	0.170883	0.166427	0	0.0912016	0.329244	0.166882	0	0.207913	0.17744	0.145978	0	0.000549056	0	0.175213	0	0.254166	0.158011	0.381149	0.121894	0.135296	0.128459
		local	0.267977	0.987472	0.635675	0.61441	0.85427	0.0187378	0.0749585	0.817603	0.219203	0.486737	0.16948	0.0883507	0.885568	0.979871	0.23192	0.321191	0.24561	0.447674	0.275577	0.360079	0.512244	0.883815	0.96912	0.99597	0.373111	0.579662	0.524765	0.590637	0.958814	0.505833	0.812242	0.996254	0.944431	0.519437	0.556222	0.472979	0.0022454	0.125671	1	0.961324	1	0.979874	0.762086	0.774495	0.481857	0.432672	0.478478
		distal	0.732023	0.0125284	0.364325	0.38559	0.14573	0.981262	0.925042	0.182397	0.780797	0.513263	0.83052	0.911649	0.114432	0.0201289	0.76808	0.678809	0.75439	0.552326	0.724423	0.639921	0.487756	0.116185	0.03088	0.00403027	0.626889	0.420338	0.475235	0.409363	0.0411864	0.494167	0.187758	0.00374627	0.0555693	0.480563	0.443778	0.527021	0.997755	0.874329	0	0.0386758	0	0.0201256	0.237914	0.225505	0.518143	0.567328	0.521522
		Cross-correlation	0.919986	0.991863	0.789502	0.913559	0.975555	0.947228	0.961355	0.89721	0.897121	0.713711	0.926305	0.947933	0.790113	0.9662	0.973662	0.952589	0.971823	0.739271	0.841015	0.755868	0.876309	0.658308	0.985471	0.984894	0.848678	0.969148	0.939327	0.884214	0.950874	0.910565	0.892835	0.995871	0.943864	0.934291	0.919598	0.956559	0.935178	0.875307	0.989667	0.896107	0.982218	0.970927	0.958953	0.960279	0.975458	0.865421	0.945551
		Likeness	0.844771	0.893675	0.704945	0.815793	0.885848	0.824513	0.864509	0.776272	0.826369	0.756946	0.841885	0.83908	0.683227	0.876654	0.918472	0.891273	0.915157	0.76089	0.809038	0.755114	0.805992	0.647694	0.8465	0.866268	0.823823	0.898232	0.881941	0.847842	0.832741	0.856224	0.809018	0.948121	0.858814	0.8744	0.863011	0.903408	0.846602	0.829613	0.921442	0.767087	0.892387	0.893461	0.874778	0.842529	0.931003	0.810507	0.88929
		Kuiper V Value	0.0448111	0.0789868	0.162825	0.0722925	0.0573385	0.100164	0.118331	0.103031	0.0939814	0.123886	0.0438509	0.0500265	0.165216	0.0707395	0.027086	0.0371679	0.0325822	0.0681479	0.0633695	0.0762389	0.0446101	0.30638	0.130328	0.112935	0.0697772	0.0292661	0.0295416	0.0676506	0.118885	0.0443333	0.118279	0.0312909	0.0754271	0.0403621	0.0470885	0.0244859	0.084184	0.065623	0.0552256	0.185376	0.076832	0.0505816	0.0395469	0.0431884	0.0213607	0.0531355	0.033018
		KS D Value	0.0442992	0.0498684	0.155427	0.0535343	0.0452562	0.0999231	0.0952657	0.0698613	0.0613162	0.119953	0.0386811	0.0415696	0.117543	0.0493045	0.0176088	0.024983	0.0278729	0.0393543	0.0538457	0.0441579	0.0231282	0.153352	0.104612	0.0926149	0.0356361	0.0208924	0.0255414	0.0652251	0.0598339	0.0439252	0.0892361	0.0220998	0.0435615	0.0374322	0.0356622	0.0239648	0.0473527	0.0631607	0.0283826	0.133784	0.0455938	0.0389166	0.0237056	0.0285859	0.0172957	0.0497888	0.0276946
Dzmix (11 plus 1085 Ma sources)	RESULTS_OUT_R2	proportions	180721FL1	BDJ1ES1	Leadville SG.	SJMT1	Temple Butte SG.	Tonka	Wood River Basin SG.	08BC-1/2	09-CM-699	10DM14	180713SWC3	BCRA-01-10	BDJLS1	CC01	Molas SG.	Surprise Canyon SG.	Tensus-Dimple SG.	06GC147	10DM15	13ROB-1	18BH1	1BDK480	SNFUM1	Cutler_south SG	1MHRCT201	1PL-534	1PS-4	1QZ19	2PCGT180	2QZ-9	2RFMMT3	3FTCT166	4SMST778	5PS-42	5PS-58	5PS-82	Battle	CO-PR2-0.2	CT1	Cutler 1 SG.	Cutler 2 SG.	Cutler 3 SG.	Eagle Valley SG. 1	Eagle Valley SG. 2	Earp-Horquilla SG.	ECS-13-2	Esplanade SG.
		Triassic Arc	0.00524252	0.0264751	0.0117033	0.0297154	0.0155301	0.00398068	0.00352207	0.023293	0.00772025	0.00586252	0.00762761	0.0111704	0.00775152	0.0197009	0.00537865	0.0111947	0.00208491	0.0112808	0.00692632	0.0116181	0.0171331	0.0177458	0.0256892	0.02159	0.00904607	0.0107882	0.00682161	0.0135422	0.00113659	0.00613668	0.011733	0.0280183	0.0141695	0.0138221	0.012657	0.0174537	0.00135425	0.0147286	0.0144007	0.00808588	0.00290215	0.0219179	0.0294648	0.013999	0.0151381	0.0126824	0.0106451
		central App.	0.659114	0.0116105	0.0573762	0.0467368	0.0526855	0.00545416	0.0022152	0.04123	0.896273	0.0600215	0.691919	0.666239	0.0700601	0.0352443	0.818088	0.722826	0.86015	0.356332	0.20248	0.126845	0.162559	0.0572326	0.0418718	0.0289491	0.11847	0.261362	0.26813	0.256943	0.00378634	0.409034	0.0236891	0.026762	0.0284448	0.333803	0.195436	0.42756	0.0117432	0.143582	0.02274	0.0591177	0.0303789	0.0273702	0.106854	0.0740328	0.35498	0.635756	0.30692
		Maya Block, SF	0.0111577	0.0236427	0.0935287	0.0291061	0.0407917	0.0188322	0.0256929	0.0590614	0.0198222	0.0874727	0.0216922	0.00755844	0.072926	0.0853367	0.0141827	0.0160459	0.0429022	0.0166422	0.051151	0.407937	0.103864	0.0359416	0.0330062	0.0491042	0.464822	0.0670082	0.0160245	0.0210039	0.0086824	0.0503412	0.0506587	0.0456271	0.0481077	0.026021	0.031854	0.0314903	0.0119892	0.543172	0.0486945	0.0236485	0.0217489	0.0297569	0.0395458	0.0502386	0.0351555	0.0154762	0.0374597
		Maya Block, Mc	0.078309	0.00315862	0.0164757	0.0081678	0.0216794	0.00721734	0.00505654	0.0138171	0.0203274	0.103714	0.122982	0.01472	0.00692626	0.022989	0.0491846	0.00650438	0.00526883	0.0085558	0.0707597	0.00892381	0.017432	0.0148869	0.0192181	0.0171019	0.117501	0.0264591	0.0200455	0.0725936	0.000525733	0.0519848	0.0210936	0.00796747	0.0170252	0.0191962	0.0393825	0.0108395	0.002502	0.118305	0.0128368	0.0111322	0.00492087	0.0270229	0.0155063	0.0284825	0.035704	0.0269747	0.0157859
		Antler recycled	0.0355544	0.0203939	0.249427	0.444341	0.125168	0.925841	0.899597	0.03606	0.0041145	0.194725	0.0359851	0.0973683	0.00522723	0.0582438	0.0302305	0.0334532	0.0168079	0.135132	0.408208	0.0669264	0.21015	0.0424578	0.0285214	0.0279273	0.0111421	0.0191463	0.113429	0.0841381	0.00081497	0.0289076	0.128831	0.0442056	0.0166822	0.156628	0.103977	0.081981	0.925071	0.0183577	0.0293355	0.0184739	0.00445151	0.0392482	0.0888956	0.0485033	0.0529198	0.0237346	0.130364
		Early Pz recycled	0.0796498	0.0298933	0.049323	0.0344839	0.0613638	0.00621028	0.00324772	0.0314586	0.0169437	0.0869135	0.0317004	0.0283638	0.00826706	0.0307236	0.0151244	0.031063	0.0145718	0.0457637	0.033528	0.0906072	0.0353458	0.0286009	0.0734475	0.0187493	0.0276413	0.0554705	0.0782695	0.0645519	0.00584036	0.0239524	0.0610155	0.0459012	0.0194869	0.0479147	0.072456	0.0804631	0.0154268	0.0527707	0.0296992	0.00598345	0.0178741	0.0294409	0.024962	0.0262838	0.0471292	0.0809255	0.0231177
		1.73 Ga	0.0327864	0.0298333	0.18869	0.240819	0.238118	0.0114408	0.0191728	0.0153734	0.00635536	0.014152	0.0119031	0.00879168	0.00645643	0.0771249	0.00684358	0.0140415	0.00499764	0.0509508	0.0189823	0.040176	0.0989311	0.0295857	0.0611905	0.0906113	0.0278457	0.0859408	0.0896488	0.0822379	0.00211499	0.0414266	0.224688	0.0855935	0.0376265	0.108798	0.0999598	0.0519811	0.00653739	0.0149757	0.0199906	0.0794032	0.0553184	0.190195	0.139818	0.367407	0.104201	0.0240335	0.0898583
		1.70 Ga	0.0352442	0.330645	0.0388229	0.0438885	0.192507	0.00350081	0.0161206	0.183465	0.00647868	0.0213706	0.010762	0.0102983	0.00382161	0.229252	0.0100268	0.0408232	0.00359554	0.126817	0.0139167	0.029617	0.0182108	0.180061	0.422979	0.423594	0.045386	0.0615116	0.048886	0.00908405	0.000954963	0.0194169	0.116759	0.332522	0.127805	0.0188008	0.0287069	0.0188951	0.00192729	0.0104785	0.115181	0.102721	0.00952231	0.0556201	0.110472	0.243768	0.0144081	0.00526359	0.0183078
		1.66 Ga	0.0230054	0.468201	0.0303531	0.0349138	0.050393	0.00655835	0.00295835	0.496735	0.00495949	0.296768	0.0423766	0.00829814	0.76093	0.0309884	0.00942332	0.0457685	0.0293705	0.129806	0.0423427	0.174967	0.234143	0.456226	0.254822	0.260729	0.0904652	0.339165	0.241335	0.294984	0.00132624	0.295256	0.0248226	0.0282361	0.263749	0.157419	0.280514	0.172143	0.00385416	0.0337423	0.11715	0.0115641	0.00506931	0.0348177	0.201886	0.0508278	0.262234	0.130261	0.209968
		1.43 Ga	0.0111165	0.0178816	0.210003	0.0718437	0.166262	0.00391984	0.0063255	0.0652937	0.00508234	0.0375085	0.00682168	0.00507512	0.0165888	0.356426	0.0207713	0.0436833	0.00392854	0.0343136	0.0226844	0.0108666	0.0301748	0.110545	0.00726979	0.0295947	0.0207944	0.016055	0.0275999	0.0489493	0.973112	0.0362598	0.300593	0.323725	0.296553	0.0470584	0.0435421	0.0196366	0.00609096	0.0130939	0.57206	0.660448	0.829756	0.184653	0.178691	0.0440354	0.0212202	0.0117038	0.0413401
		530 Ga	0.00456606	0.0226098	0.0120866	0.0109471	0.0268932	0.00264559	0.00716974	0.0139057	0.00437408	0.0751128	0.00670135	0.0136995	0.0360183	0.0271172	0.00885374	0.00639098	0.0146187	0.00958864	0.0135595	0.00281583	0.00845032	0.0174427	0.0160387	0.0142485	0.0540971	0.0236205	0.01401	0.00970201	0.000682865	0.0256927	0.0210964	0.0123113	0.108537	0.013541	0.00589541	0.0147573	0.00305281	0.00848241	0.0117067	0.00547644	0.00883754	0.341865	0.025763	0.0216305	0.0165173	0.00899585	0.0132566
		1.085 Ga	0.0242539	0.0156556	0.0422102	0.00503721	0.00860809	0.00439902	0.00892187	0.0203071	0.00754903	0.0163783	0.00952968	0.128417	0.0050266	0.0268533	0.0118922	0.0282049	0.00170286	0.074818	0.115461	0.0286995	0.0636059	0.00927441	0.0159464	0.0178012	0.0127889	0.0334728	0.0758008	0.0422699	0.00102276	0.0115919	0.0150197	0.0191303	0.0218136	0.0569979	0.0856186	0.0727995	0.0104509	0.0283115	0.00620494	0.0139459	0.0092198	0.0180925	0.0381418	0.0307911	0.0403925	0.0241925	0.102978
		local	0.130972	0.884826	0.522166	0.407449	0.682782	0.0324645	0.0606689	0.79508	0.034799	0.461291	0.0880944	0.17458	0.828842	0.747762	0.0678108	0.178912	0.0582138	0.426293	0.226946	0.287142	0.453516	0.803134	0.778246	0.836578	0.251377	0.559766	0.49728	0.487227	0.979214	0.429644	0.702979	0.801518	0.856084	0.402615	0.544237	0.350212	0.0319135	0.109084	0.842293	0.873558	0.917724	0.825243	0.694772	0.75846	0.458974	0.204451	0.475708
		distal	0.869028	0.115174	0.477834	0.592551	0.317218	0.967536	0.939331	0.20492	0.965201	0.538709	0.911906	0.82542	0.171158	0.252238	0.932189	0.821088	0.941786	0.573707	0.773054	0.712858	0.546484	0.196866	0.221754	0.163422	0.748623	0.440234	0.50272	0.512773	0.0207864	0.570356	0.297021	0.198482	0.143916	0.597385	0.455763	0.649788	0.968087	0.890916	0.157707	0.126442	0.0822764	0.174757	0.305228	0.24154	0.541026	0.795549	0.524292
	RESULTS_OUT_V	Triassic Arc	0.0352824	0.0132507	0.0194399	0.0201167	0.031786	0.00417537	0.00326254	0.0401299	0.0219458	0.0341761	0.0221593	0.0131806	0.0161865	0.0298818	0.0160917	0.021901	0.0241043	0.0276967	0.0339805	0.0229716	0.0361804	0.0183191	0.0374366	0.0151817	0.0372573	0.0367162	0.0147833	0.0264123	0.021567	0.0282872	0.0140995	0.0257859	0.0184921	0.0196628	0.0407497	0.0312394	0.00661276	0.0281931	0.0210787	0.0085798	0.021645	0.0566631	0.0211311	0.0227211	0.0270871	0.00895783	0.0205577
		central App.	0.46974	0.0166134	0.0646951	0.0317419	0.0426034	0.00391526	0.00317351	0.0499167	0.718142	0.0708758	0.474534	0.681747	0.18909	0.0596608	0.678839	0.67881	0.669268	0.239163	0.163926	0.283032	0.192147	0.363325	0.0382486	0.0255879	0.158743	0.19062	0.165086	0.149748	0.097421	0.320789	0.0716037	0.0209075	0.0620082	0.263858	0.106882	0.234753	0.0125944	0.0634146	0.0358578	0.201971	0.0700551	0.0300595	0.0639699	0.0849928	0.186641	0.457047	0.171948
		Maya Block, SF	0.0421523	0.0400628	0.0281153	0.0302951	0.0419039	0.0101779	0.0052032	0.0317421	0.0900248	0.0857994	0.0700724	0.0393288	0.0466358	0.0770897	0.00983853	0.011257	0.0913749	0.018231	0.0523834	0.20987	0.0789997	0.0145329	0.0152161	0.0289683	0.335158	0.115467	0.0491326	0.0376303	0.131237	0.0584754	0.0638376	0.0164792	0.052104	0.0462366	0.0564225	0.0202979	0.011749	0.563992	0.032704	0.177754	0.0346201	0.0453394	0.0530167	0.0911804	0.113581	0.0136911	0.0371051
		Maya Block, Mc	0.049364	0.0178761	0.0312274	0.0255722	0.0149797	0.00478593	0.00270132	0.0229836	0.0108526	0.0834433	0.0977454	0.0384021	0.0449586	0.0349131	0.0752176	0.00355301	0.017094	0.0272662	0.072502	0.0290611	0.0285284	0.0166123	0.026111	0.042011	0.0569321	0.0261812	0.038305	0.0402471	0.0159223	0.0413587	0.0443588	0.0237923	0.0225243	0.0177722	0.0565884	0.0163041	0.0166892	0.0301432	0.0515323	0.0186155	0.0121701	0.0300135	0.0348269	0.0262717	0.0166241	0.0148198	0.0256889
		Antler recycled	0.0344034	0.023945	0.267213	0.379453	0.135657	0.934621	0.917232	0.0396934	0.0198903	0.16507	0.0558862	0.0338647	0.0216948	0.0335247	0.0586149	0.0333388	0.0355318	0.2053	0.363518	0.0673463	0.153987	0.00732857	0.0149957	0.0283499	0.0363802	0.0413852	0.0724651	0.113915	0.0156868	0.0502317	0.0915911	0.029561	0.040277	0.145551	0.108157	0.0813571	0.892948	0.0181232	0.0218365	0.0221815	0.0249453	0.0623337	0.0617022	0.0582166	0.0956738	0.0884588	0.138799
		Early Pz recycled	0.108423	0.0287151	0.0323386	0.0338547	0.0449393	0.0075602	0.00373973	0.0785469	0.0151947	0.134844	0.0927677	0.0402143	0.071302	0.0314461	0.0238795	0.039364	0.0293315	0.0527679	0.0463385	0.0516817	0.0691928	0.0965284	0.0220069	0.00899827	0.065095	0.0818786	0.156508	0.110247	0.126707	0.0711722	0.037768	0.0568158	0.0284931	0.0920399	0.0937688	0.133576	0.0257193	0.117604	0.0515774	0.04364	0.0317331	0.0655976	0.0557756	0.0672862	0.152718	0.0613296	0.053815
		1.73 Ga	0.0429053	0.048885	0.186194	0.140607	0.199877	0.00986524	0.0178948	0.0670964	0.0221853	0.0388006	0.016716	0.00747636	0.0402844	0.0369896	0.0139345	0.0404984	0.0386961	0.077815	0.0589783	0.0606951	0.0669504	0.0136512	0.051632	0.0978174	0.0342525	0.0560251	0.0612691	0.0241503	0.0307794	0.055405	0.0830273	0.0467431	0.0252671	0.0568701	0.0432801	0.0491423	0.005529	0.0214893	0.028211	0.0451776	0.0483911	0.1481	0.0849418	0.230214	0.0405688	0.0336772	0.0696948
		1.70 Ga	0.043344	0.252677	0.0563957	0.0730835	0.179732	0.00641802	0.0150077	0.0941799	0.0115853	0.0242869	0.0341212	0.0109346	0.022616	0.240085	0.0167533	0.0590986	0.0196386	0.0540988	0.0339938	0.0219023	0.051197	0.0391014	0.465802	0.423741	0.0528534	0.0776403	0.0729835	0.0282261	0.0152986	0.0256704	0.164318	0.368815	0.0572817	0.022078	0.0427435	0.0457214	0.00242452	0.0236272	0.0539474	0.100143	0.0578795	0.13946	0.076981	0.206799	0.0450808	0.0325199	0.0771968
		1.66 Ga	0.0529688	0.465732	0.0564327	0.11089	0.131974	0.0031029	0.00863658	0.410965	0.0056586	0.208409	0.0301758	0.0135311	0.231449	0.191887	0.0443267	0.036508	0.0213285	0.10607	0.0369345	0.121532	0.181522	0.104657	0.265187	0.249429	0.115483	0.217209	0.187308	0.263476	0.0247166	0.196871	0.200818	0.0970895	0.327213	0.196466	0.204815	0.166539	0.00788406	0.0187039	0.243856	0.111052	0.0672951	0.0756996	0.277055	0.0799453	0.176877	0.119149	0.116833
		1.43 Ga	0.0337321	0.0354211	0.205829	0.115489	0.115387	0.00366426	0.00679868	0.0694264	0.0225715	0.0851543	0.0271912	0.00442677	0.279891	0.214448	0.0236295	0.0342081	0.013554	0.104312	0.0547125	0.0338331	0.0680265	0.283042	0.0216891	0.0487819	0.0210604	0.0873642	0.0900226	0.110127	0.491133	0.0596648	0.16569	0.261241	0.240439	0.0885231	0.141194	0.102034	0.00351178	0.0272719	0.414206	0.239706	0.542962	0.0798435	0.207851	0.0497346	0.0777547	0.122538	0.144432
		530 Ga	0.0141876	0.0373612	0.0158532	0.0163976	0.0447233	0.00752919	0.00984007	0.0401472	0.0414799	0.0350991	0.0245857	0.0223341	0.0313931	0.0255172	0.0282406	0.0097388	0.0224607	0.0199629	0.0172073	0.0395747	0.0265198	0.0264433	0.0110286	0.0201871	0.0656005	0.0258914	0.0285988	0.0371697	0.0169044	0.0457704	0.0304993	0.03714	0.0965909	0.01849	0.0193531	0.0202545	0.00369549	0.0197965	0.0330828	0.0145061	0.0550136	0.224527	0.0132414	0.025389	0.0209655	0.0164923	0.0413879
		1.085 Ga	0.0734976	0.0194599	0.0362662	0.0224995	0.0164381	0.00418478	0.00651005	0.0551727	0.0204688	0.0340418	0.0540453	0.0945597	0.00449877	0.024556	0.0106339	0.0317239	0.0176181	0.0673157	0.0655253	0.0584995	0.0467495	0.0164596	0.0306464	0.0109456	0.0211838	0.043622	0.0635381	0.0586516	0.012627	0.0463042	0.0323883	0.0156297	0.0293095	0.032452	0.0860465	0.098782	0.0106423	0.0676411	0.0121101	0.0166733	0.0332905	0.0423633	0.0495065	0.0572499	0.0464271	0.0313194	0.102541
		local	0.260635	0.859537	0.556971	0.478967	0.688131	0.0347644	0.0646879	0.736987	0.123949	0.425792	0.186835	0.153263	0.610132	0.733484	0.137519	0.211776	0.133296	0.429575	0.267352	0.336037	0.440965	0.483354	0.845985	0.850903	0.310434	0.507752	0.50372	0.521801	0.591459	0.429686	0.676741	0.826658	0.776101	0.414879	0.537432	0.482472	0.0336872	0.17853	0.785413	0.527258	0.804831	0.709993	0.709577	0.649331	0.407674	0.355696	0.552086
		distal	0.739365	0.140463	0.443029	0.521033	0.311869	0.965236	0.935312	0.263013	0.876051	0.574208	0.813165	0.846737	0.389868	0.266516	0.862481	0.788224	0.866704	0.570425	0.732648	0.663963	0.559035	0.516646	0.154015	0.149097	0.689566	0.492248	0.49628	0.478199	0.408541	0.570314	0.323259	0.173342	0.223899	0.585121	0.462568	0.517528	0.966313	0.82147	0.214587	0.472742	0.195169	0.290007	0.290423	0.350669	0.592326	0.644304	0.447914
	RESULTS_OUT_D	Triassic Arc	0.022684	0.00372623	0.0349092	0.025907	0.0304962	0.00419555	0.00326254	0.0445614	0.0269332	0.0360271	0.0212099	0.0107223	0.072108	0.0313996	0.0157856	0.0058752	0.0144437	0.0271861	0.031104	0.026654	0.0356279	0.0134687	0.0245493	0.0236105	0.0444124	0.0200023	0.0198837	0.0233324	0.0149908	0.0237036	0.00775701	0.0250846	0.0174852	0.0121047	0.026721	0.0159493	0.0032661	0.0148599	0.0383706	0.0339924	0.0188287	0.0666444	0.0276649	0.0275105	0.0199878	0.0216014	0.0237044
		central App.	0.376826	0.00858446	0.0591238	0.0268938	0.0413052	0.00389016	0.00317351	0.055606	0.718998	0.0826014	0.442543	0.615596	0.0963844	0.0554812	0.695835	0.551237	0.637869	0.135757	0.156494	0.283423	0.131898	0.119642	0.0420868	0.0360293	0.0960808	0.21079	0.132133	0.101828	0.0701694	0.279858	0.0519551	0.0200277	0.038971	0.210603	0.0869861	0.229486	0.0135579	0.0758017	0.0206202	0.0262987	0.0516858	0.034944	0.0384745	0.0405165	0.15522	0.219671	0.081366
		Maya Block, SF	0.0939214	0.0385543	0.0543676	0.0437446	0.0227548	0.00967878	0.0052032	0.0433957	0.0864549	0.082953	0.0493973	0.0628887	0.046284	0.0639105	0.013845	0.0286751	0.0780164	0.0315686	0.0388125	0.149125	0.0510614	0.0445657	0.00935218	0.021277	0.342271	0.10257	0.044566	0.0772956	0.0552921	0.0265417	0.00899722	0.0115856	0.0680597	0.0318494	0.0783103	0.04501	0.00433566	0.562279	0.0395223	0.0669201	0.0614039	0.0580871	0.0375044	0.0324845	0.070662	0.0180997	0.0332668
		Maya Block, Mc	0.0355685	0.00767115	0.027602	0.0251373	0.0340825	0.0067172	0.00270132	0.017711	0.0133361	0.0306161	0.0667565	0.0278954	0.0249033	0.0235845	0.0635009	0.0158435	0.0278167	0.0141553	0.0422231	0.0217642	0.0194167	0.00622747	0.0231697	0.0138089	0.0955688	0.024633	0.0261257	0.0251666	0.0477582	0.0431775	0.0192901	0.0246173	0.0241738	0.014411	0.0193936	0.0242134	0.00602886	0.0381272	0.0123298	0.0499512	0.00740213	0.0447509	0.0237821	0.0142384	0.0440213	0.0290256	0.0373629
		Antler recycled	0.0424402	0.0289592	0.273593	0.431552	0.157835	0.928093	0.917232	0.0525049	0.00115639	0.158149	0.0665824	0.0316409	0.0306341	0.0511297	0.0373265	0.057422	0.0480975	0.217702	0.405637	0.106974	0.153219	0.0503116	0.0633543	0.0319486	0.0225703	0.0712982	0.107099	0.118465	0.03392	0.0737945	0.171226	0.0548996	0.034828	0.162719	0.146045	0.170854	0.873435	0.0278005	0.0523687	0.0903687	0.0397699	0.0553003	0.102151	0.0807661	0.0962646	0.0774997	0.133474
		Early Pz recycled	0.110512	0.061792	0.0337827	0.0415033	0.0832334	0.00965716	0.00373973	0.056178	0.0193897	0.230372	0.0962729	0.0390712	0.044933	0.0280816	0.0207984	0.0911824	0.0419101	0.129371	0.0599472	0.0621204	0.142277	0.123166	0.0403942	0.0881445	0.0796483	0.117887	0.150429	0.157599	0.063532	0.104839	0.118032	0.0568017	0.0372945	0.154239	0.123012	0.102709	0.0693224	0.0711097	0.0568862	0.0366442	0.0309428	0.0623486	0.0624802	0.119309	0.173166	0.138432	0.128456
		1.73 Ga	0.042811	0.0594477	0.0913962	0.163028	0.177188	0.009593	0.0178948	0.0390344	0.0159787	0.027194	0.0273218	0.0194308	0.0420528	0.0752881	0.0140908	0.0274901	0.0350332	0.0716488	0.0416516	0.040303	0.102497	0.0121683	0.161594	0.0989399	0.0341847	0.043024	0.066686	0.0439014	0.0313965	0.030545	0.140832	0.0826961	0.0273565	0.0589072	0.0899337	0.0530505	0.00735546	0.0353189	0.0183162	0.05621	0.0581089	0.10896	0.0805935	0.238541	0.05422	0.0287813	0.0960749
		1.70 Ga	0.0410717	0.280091	0.102771	0.0401952	0.20251	0.00649491	0.0150077	0.159625	0.0129663	0.0626182	0.0327451	0.0181623	0.0497586	0.262707	0.0356697	0.0288082	0.0236492	0.0516716	0.0381621	0.0374555	0.040498	0.0501553	0.401872	0.449709	0.0673831	0.0794906	0.0909143	0.0501422	0.0268593	0.0488164	0.194613	0.344629	0.0911037	0.0710768	0.0448183	0.0260602	0.00169709	0.0311402	0.0989794	0.133064	0.0644265	0.11438	0.103019	0.195788	0.06041	0.0724135	0.0363209
		1.66 Ga	0.0656971	0.450203	0.141197	0.118323	0.127257	0.00633343	0.00863658	0.396296	0.020372	0.170575	0.040884	0.0222439	0.172715	0.152189	0.02932	0.0775261	0.0188898	0.126456	0.036622	0.110366	0.152248	0.217543	0.183456	0.191546	0.0831117	0.201576	0.170995	0.229242	0.0723172	0.19152	0.124536	0.102884	0.290493	0.132448	0.149315	0.149381	0.00639525	0.0254942	0.206794	0.196304	0.0622611	0.138977	0.243498	0.0750085	0.160603	0.108795	0.175234
		1.43 Ga	0.0579836	0.0346296	0.135212	0.0553882	0.0718862	0.00347056	0.00679868	0.0600796	0.0280204	0.0562604	0.031193	0.00953356	0.29757	0.197542	0.0367529	0.0506778	0.0217626	0.110084	0.0479101	0.0447476	0.0665839	0.268572	0.0196563	0.0147768	0.0443713	0.0934164	0.0949159	0.0944115	0.511424	0.0698911	0.129545	0.252321	0.230304	0.0953141	0.133489	0.0882494	0.00473254	0.0379494	0.41196	0.232841	0.546524	0.0859681	0.192772	0.0860043	0.0739573	0.166242	0.114072
		530 Ga	0.0314156	0.0073872	0.0229255	0.0190537	0.0289573	0.00769245	0.00984007	0.034512	0.0334555	0.0233549	0.0552216	0.0372875	0.0527926	0.0330269	0.0230654	0.014381	0.0131962	0.0128926	0.0235237	0.0462851	0.042754	0.0380085	0.0157416	0.00777971	0.0419633	0.0144877	0.0257289	0.0198901	0.0371814	0.0446233	0.017381	0.0106097	0.0790778	0.0220977	0.037576	0.0173127	0.00233914	0.0141894	0.0304611	0.0493515	0.0254464	0.185839	0.0306525	0.0172502	0.0366798	0.0295892	0.0298448
		1.085 Ga	0.0790692	0.0189548	0.0231201	0.00927384	0.022494	0.00418421	0.00651005	0.040496	0.0229384	0.0392794	0.0698727	0.105527	0.0698638	0.0256598	0.0140097	0.0508815	0.0393154	0.0715073	0.0779129	0.0707828	0.0619191	0.056171	0.0147737	0.0224298	0.0484346	0.0208249	0.0705243	0.0587262	0.035159	0.0626896	0.0158352	0.0138439	0.0608526	0.03423	0.0643993	0.0777252	0.00753478	0.0659299	0.0133921	0.0280538	0.0331998	0.0437992	0.0574078	0.072582	0.0548081	0.0898492	0.110823
		local	0.318048	0.850713	0.516622	0.405262	0.630293	0.0377686	0.0646879	0.730043	0.133731	0.379282	0.257238	0.212185	0.684753	0.746413	0.152909	0.249765	0.151846	0.44426	0.265782	0.34994	0.4665	0.642618	0.797093	0.785181	0.319449	0.45282	0.519764	0.496314	0.714337	0.448086	0.622742	0.806984	0.779188	0.414074	0.519531	0.411779	0.0300543	0.210022	0.779902	0.695825	0.789967	0.677925	0.707943	0.685175	0.440678	0.49567	0.56237
		distal	0.681952	0.149287	0.483378	0.594738	0.369707	0.962231	0.935312	0.269957	0.866269	0.620718	0.742762	0.787815	0.315247	0.253587	0.847091	0.750235	0.848154	0.55574	0.734218	0.65006	0.5335	0.357382	0.202907	0.214819	0.680551	0.54718	0.480236	0.503686	0.285663	0.551914	0.377258	0.193016	0.220812	0.585926	0.480469	0.588221	0.969946	0.789978	0.220098	0.304175	0.210033	0.322075	0.292057	0.314825	0.559322	0.50433	0.43763
		R2 mean	0.656984	0.945318	0.435555	0.596276	0.802328	0.898874	0.927064	0.886472	0.680684	0.44608	0.722381	0.770311	0.489082	0.863831	0.819587	0.769046	0.805681	0.490795	0.53202	0.468867	0.487631	0.341006	0.938353	0.942375	0.668301	0.810554	0.610178	0.533367	0.833142	0.671059	0.584948	0.897221	0.786907	0.524482	0.57084	0.618769	0.899027	0.491648	0.896418	0.806328	0.975715	0.800617	0.787099	0.923026	0.698076	0.621447	0.656865
		V mean	0.133093	0.224918	0.301076	0.221519	0.230826	0.119839	0.110934	0.18717	0.137897	0.185199	0.135397	0.165061	0.340984	0.289879	0.102677	0.122847	0.104923	0.197203	0.142608	0.144901	0.190539	0.497804	0.25625	0.252287	0.132423	0.152123	0.162838	0.217526	0.493502	0.15505	0.348058	0.265951	0.240521	0.19035	0.184365	0.16965	0.140428	0.143521	0.341618	0.587254	0.368452	0.240426	0.220794	0.185137	0.14143	0.18801	0.170661
		D mean	0.0810454	0.148671	0.174687	0.140304	0.143159	0.06964	0.0752142	0.110065	0.0841833	0.107187	0.0764062	0.0947041	0.194012	0.157569	0.0626327	0.0875105	0.0672655	0.12083	0.0888912	0.0848216	0.114926	0.256811	0.165287	0.169227	0.0837157	0.0917125	0.103166	0.125529	0.256098	0.0897702	0.194529	0.168414	0.137493	0.119971	0.113209	0.115378	0.111806	0.0913717	0.19673	0.298515	0.20327	0.132883	0.137273	0.118622	0.0964986	0.119242	0.105155
[truncated: 150 more columns]
